# Supplementary figures and images for: Deletion of VPS50 protein in mice brain impairs synaptic function and behavior
Source: PubMed Central journal article supplement — bioRxiv. 2023 Jul 5:2023.07.04.547745. Preprint. [Version 1] doi: 10.1101/2023.07.04.547745 (PMC10349947; doi:10.1101/2023.07.04.547745), 2023-07-05

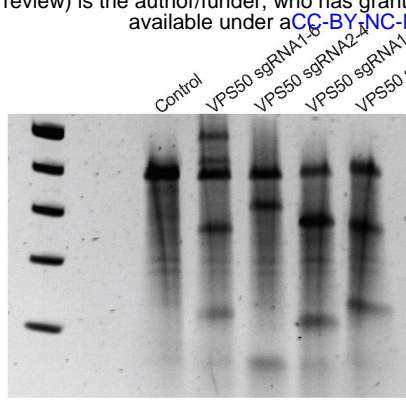

**B**

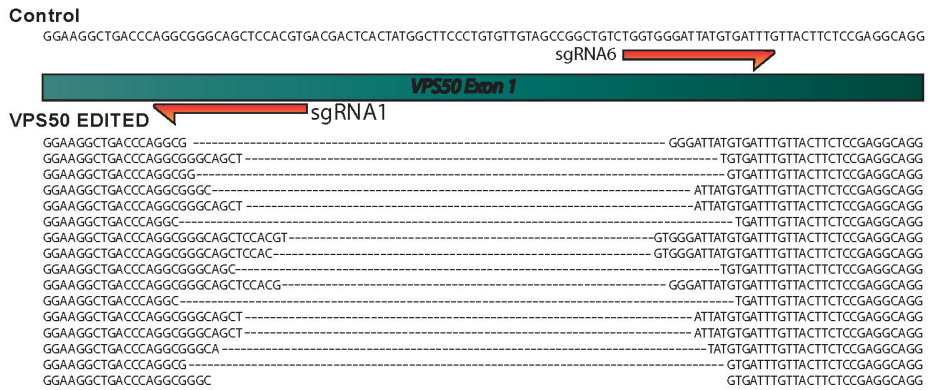

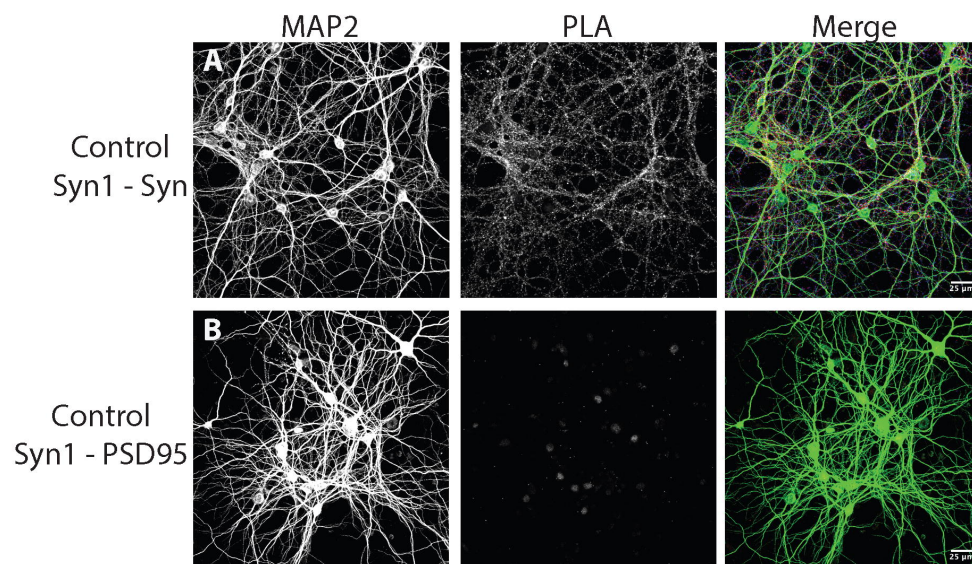

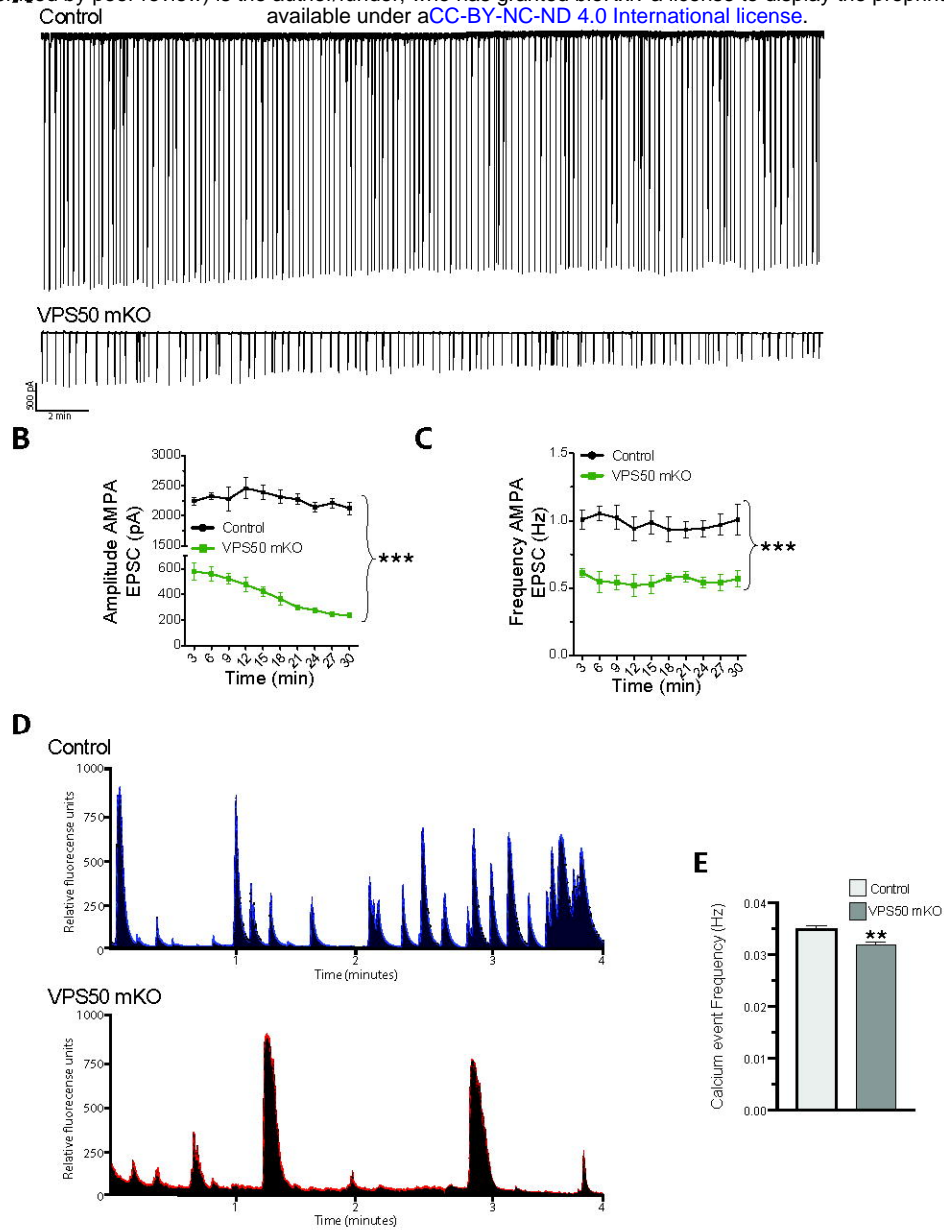

Supplement: NIHPP2023.07.04.547745V1-supplement-1.pdf [file NIHPP2023.07.04.547745V1-supplement-1.pdf]
